# Supplementary material for: The role of polygenic susceptibility to obesity among carriers of pathogenic mutations in MC4R in the UK Biobank population
Source: PLoS Med. 2020 Jul 21;17(7):e1003196. doi: 10.1371/journal.pmed.1003196 (PMC7373259; doi:10.1371/journal.pmed.1003196)
Supplement: S2 Table — The sequencing dataset is based on the European subset only because of allele frequency differences for some variants between the European and other populations, such as the African American population. It is also based on the same subset that was analyzed in our analyses of the genotyping data. *Refers to the number of individuals who were carriers in the genotyped dataset but noncarriers in the sequencing dataset. **Refers to the number of individuals who were carriers in the sequenced dataset but noncarriers in the genotyping dataset. *** FFP = high (>25%) false positive proportion; NFP = high (>25%) false negative proportion. MC4R, melanocortin 4 receptor gene. (XLSX) [file pmed.1003196.s006.xlsx]

## Sheet: S2 Table
S2 Table: Quality of 69 genotypd mutations in MC4R in UK Biobank participants of European ancestry
					UK Biobank GWAS (N~450,000)		gnomAD non-Finnish European ancestry	UK Biobank Comparison of GWAS and WES data (N~46,000)											Mannual inspection of genotyping cluster plots (N~450,000)				Overall quality assessment
								Expect number of carriers in ~46,000 people, based on GNOMAD MAF (N)	GWAS data			WES data			False Positives*		False Negatives**
Chr.	Position	Afx-ID	SNP	Amino Acid Change	Number of carriers	Minor allele frequency (%)	Minor allele frequency (%)		Carriers (N)	Non-Carriers (N)	Missing calls (N)	Carriers (N)	Non-Carriers (N)	Missing calls (N)	N	Proportion of genotyped carriers (%)	N	Proportion of genotyped carriers (%)	Investigator 1	Invetigator 2	Investigator 3	Overall review	GWAS vs Exome in ~46,000 inidviduals***	Inspection of cluster plots in ~450,000
18	58039177	Affx-89005586	Affx-89005586	Ser136Pro	12	1.3e-05	0	0	0	45716	45	0	45761	NA	0	0	0	0	good	good	good	good	good	good
18	58038687	Affx-15141149	rs52804924	Pro299His	10	1.1e-05	1.549e-05	1.41768	1	45251	509	1	45760	0	0	0	0	0	good	good	good	good	good	good
18	58039266	Affx-89015702	Affx-89015702	Leu106Pro	2	2e-06	-	-	0	45739	22	0	45761	NA	0	0	0	0	good	good	good	good	good	good
18	58039478	Affx-15141172	rs13447324	Tyr35Ter	66	7.2e-05	0.0001549	14.1768	4	45729	28	4	45757	0	0	0	0	0	good	good	good	good	good	good
18	58038927	rs121913567	rs121913567	Ala219Val	2	2e-06	-	-	0	45739	22	0	45761	NA	0	0	0	0	good	good	good	good	good	good
18	58039398	rs121913566	rs121913566	Asn62Ser	1	1e-06	0	0	0	43145	2616	0	45761	NA	0	0	0	0	good	good	good	good	good	good
18	58038669	Affx-80259083	rs775382722	Arg305Gln	8	8e-06	8.795e-06	0.804936	0	44838	923	1	45760	0	0	0	1	1	good	good	good	good	FNP	good
18	58039089	Affx-89018133	rs747681609	Arg165Gln	39	4.3e-05	1.76e-05	1.61079	4	45707	50	4	45757	0	1	0.25	1	0.25	good	good	good	good	good	good
18	58039302	Affx-89020886	rs772213710	Ser94Asn	7	7e-06	1.758e-05	1.60896	0	45708	53	0	45761	NA	0	0	0	0	good	good	good	good	good	good
18	58038771	Affx-89021050	Affx-89021050	Cys271Phe	33	3.6e-05	0	0	3	45728	30	0	45761	NA	3	1	0	0	good	good	good	good	FPP	good
18	58039441	Affx-89012664	rs1367004987	Pro48Ser	3	3e-06	1.76e-05	1.61079	1	43679	2081	0	45761	NA	1	1	0	0	good	good	good	good	FPP	good
18	58038801	Affx-89015685	Affx-89015685	Phe261Ser	11	1.2e-05	-	-	3	45725	33	0	45761	NA	3	1	0	0	good	good	good	good	FPP	good
18	58038678	Affx-89014374	rs1316381133	Tyr302Phe	39	4.3e-05	1.759e-05	1.60987	2	45657	102	1	45760	0	1	0.5	0	0	Intermediate	good	intermediate	intermediate	FPP	unacceptable
18	58038892	Affx-89025179	rs1363347811	Gly231Ser	9	9e-06	3.23039e-05	2.95652	2	45703	56	2	45759	0	1	0.5	1	0.5	good	good	good	good	FPP, FNP	good
18	58038891	Affx-89021399	Affx-89021399	Gly231Val	36	3.9e-05	4.651e-05	4.25669	2	45738	21	0	45761	NA	2	1	0	0	good	intermediate	intermediate	intermediate	FPP	unacceptable
18	58038654	Affx-89017824	rs1429906794	Arg310Lys	7	7e-06	0	0	0	45724	37	0	45761	NA	0	0	0	0	good	good	good	good	good	good
18	58039122	Affx-89012101	rs761855498	Ala154Asp	14	1.5e-05	1.759e-05	1.60987	1	45730	30	0	45761	NA	0	0	0	0	Intermediate	good	good	good	good	good
18	58038877	Affx-89019310	rs758426526	Arg236Cys	104	0.000114	8.524e-05	7.80134	8	45719	34	8	45753	0	0	0	0	0	good	good	good	good	good	good
18	58038634	Affx-89019383	rs778685158	Ile317Val	32	3.5e-05	2.323e-05	2.12606	1	45729	31	1	45760	0	0	0	0	0	good	good	good	good	good	good
18	58039300	rs13447328	rs13447328	Val95Ile	78	8.6e-05	0%%	0	10	45682	69	8	45753	0	2	0.2	0	0	good	good	good	good	good	good
18	58039356	rs199558727	rs199558727	His76Arg	56	6.2e-05	3.098e-05	2.83535	5	45733	23	5	45756	0	0	0	0	0	good	good	good	good	good	good
18	58039281	Affx-89025132	Affx-89025132	Thr101Asn	12	1.3e-05	-	-	1	45739	21	0	45761	NA	1	1	0	0	good	good	good	good	FPP	good
18	58039350	rs13447326	rs13447326	Pro78Leu	3	3e-06	-	-	0	45726	35	0	45761	NA	0	0	0	0	good	good	good	good	good	good
18	58038772	Affx-89016437	rs1057517991	Cys271Arg	3	3e-06	0	0	0	44717	1044	0	45761	NA	0	0	0	0	good	good	good	good	good	good
18	58038610	Affx-89007433	Affx-89007433	Leu325Phe	14	1.5e-05	-	-	0	45724	37	0	45761	NA	0	0	0	0	intermediate	good	intermediate	intermediate	good	unacceptable
18	58038676	Affx-89024557	rs762251697	Ala303Thr	7	7e-06	8.796e-06	0.805028	1	45711	49	0	45761	NA	1	1	0	0	good	good	good	good	FPP	good
18	58039551	Affx-89010913	Affx-89010913	Thr11Ser	30	3.4e-05	-	-	0	45666	95	0	45761	NA	0	0	0	0	good	good	good	good	good	good
18	58039134	Affx-89023328	rs766665118	Thr150Ile	30	3.3e-05	8.793e-06	0.804753	3	45686	72	0	45761	NA	3	1	0	0	good	good	intermediate	good	FPP	good
18	58038718	Affx-89015531	Affx-89015531	Ile289Leu	20	2.2e-05	-	-	2	45724	35	0	45761	NA	2	1	0	0	good	good	good	good	FPP	good
18	58038852	rs13447335	rs13447335	Ala244Glu	53	5.8e-05	1.55e-05	1.41859	9	45688	64	1	45753	7	8	0.888889	0	0	good	good	good	good	FPP	good
18	58039090	rs13447332	rs13447332	Arg165Trp	36	3.9e-05	1.76e-05	1.61079	8	45711	42	7	45754	0	1	0.125	0	0	good	good	good	good	good	good
18	58038829	rs13447336	rs13447336	Gly252Ser	141	0.000155	7.747e-05	7.09021	14	45724	23	14	45747	0	0	0	0	0	good	good	good	good	good	good
18	58038777	rs79783591	rs79783591	Ile269Asn	38	4.1e-05	0	0	2	45706	53	0	45761	NA	2	1	0	0	good	good	good	good	FPP	good
18	58038664	Affx-89006855	rs745973015	Gln307Term	18	1.9e-05	1.759e-05	1.60987	2	45742	17	0	45761	NA	2	1	0	0	good	good	good	good	FPP	good
18	58039343	Affx-89005662	rs895704914	Tyr80Term	21	2.3e-05	-	-	1	45704	56	0	45761	NA	1	1	0	0	good	good	good	good	FPP	good
18	58039075	rs121913560	rs121913560	Ile170Val	44	5e-05	5.422e-05	4.96232	2	44306	1453	3	45758	0	0	0	1	0.333333	good	good	good	good	FNP	good
18	58038980	Affx-89008586	rs764197417	Phe201Leu	11	1.2e-05	1.76e-05	1.61079	1	45726	34	0	45761	NA	1	1	0	0	Intermediate	intermediate	intermediate	intermediate	FPP	unacceptable
18	58038636	rs121913564	rs121913564	Ile316Ser	17	1.8e-05	0	0	2	45687	72	0	45761	NA	2	1	0	0	good	intermediate	good	good	FPP	good
18	58039535	Affx-89021068	Affx-89021068	Trp16Term	4	4e-06	-	-	0	45739	22	0	45761	NA	0	0	0	0	good	good	good	good	good	good
18	58038826	rs187152753	rs187152753	Val253Ile	126	0.000139	7.748e-05	7.09112	10	45710	41	8	45753	0	2	0.2	0	0	Intermediate	good	intermediate	intermediate	good	unacceptable
18	58039494	rs13447323	rs13447323	Ser30Phe	152	0.000167	0.0001317	12.0534	16	45718	27	16	45745	0	0	0	0	0	good	good	good	good	good	good
18	58038870	Affx-89024936	rs751428978	Gly238Asp	21	2.3e-05	0	0	1	45733	27	0	45761	NA	1	1	0	0	good	intermediate	Intermediate	intermediate	FPP	unacceptable
18	58039563	rs142837166	rs142837166	Arg7His	52	5.7e-05	2.35e-05	2.15077	2	45719	40	2	45759	0	0	0	0	0	good	good	good	good	good	good
18	58039315	Affx-89014096	Affx-89014096	Asp90Asn	9	9e-06	-	-	2	45748	11	0	45761	NA	2	1	0	0	Intermediate	intermediate	intermediate	intermediate	FPP	unacceptable
18	58039087	Affx-89013845	rs942758928	Val166Ile	29	3.2e-05	8.798e-06	0.805211	2	45686	73	0	45761	NA	2	1	0	0	poor	poor	poor	poor	FPP	unacceptable
18	58039435	rs121913557	rs121913557	Val50Met	5	5e-06	-	-	0	45705	56	0	45761	NA	0	0	0	0	good	good	good	good	good	good
18	58039456	Affx-89010029	rs1288335099	Gln43Term	10	1.1e-05	8.8e-06	0.805394	0	45673	88	0	45761	NA	0	0	0	0	good	good	good	good	good	good
18	58039116	Affx-89023672	rs1253353185	Gln156Pro	7	8e-06	0	0	0	43963	1798	0	45761	NA	0	0	0	0	good	good	good	good	good	good
18	58039346	Affx-89016685	Affx-89016685	Met79Ile	16	1.7e-05	0	0	0	45734	27	0	45761	NA	0	0	0	0	good	good	good	good	good	good
18	58039041	rs13447333	rs13447333	Gly181Asp	9	1e-05	3.519e-05	3.22066	0	42151	3610	0	45761	NA	0	0	0	0	good	good	good	good	good	good
18	58038762	rs121913561	rs121913561	Asn274Ser	7	7e-06	1.76e-05	1.61079	1	44230	1530	1	45760	0	0	0	0	0	good	good	good	good	good	good
18	58039060	rs121913563	rs121913563	Ala175Thr	21	2.3e-05	0.0001317	12.0534	3	45696	62	3	45758	0	0	0	0	0	good	good	good	good	good	good
18	58039419	Affx-89005392	Affx-89005392	Gly55Asp	17	1.8e-05	-	-	2	45732	27	0	45761	NA	2	1	0	0	intermediate	intermediate	poor	poor	FPP	unacceptable
18	58038977	rs138281308	rs138281308	Phe202Leu	17	1.8e-05	0	0	2	45725	34	1	45760	0	1	0.5	0	0	good	good	good	good	FPP	good
18	58038588	Affx-89015064	rs1284421361	Tyr332Cys	18	2e-05	6.479e-05	5.92971	1	45734	26	1	45760	0	0	0	0	0	good	intermediate	good	good	good	good
18	58039098	Affx-89023118	Affx-89023118	Thr162Ile	22	2.4e-05	-	-	2	45680	79	0	45761	NA	2	1	0	0	good	intermediate	intermediate	intermediate	FPP	unacceptable
18	58038589	Affx-89010337	rs776032308	Tyr332His	2	2e-06	0	0	1	45239	521	0	45761	0	1	1	0	0	good	good	good	good	FPP	good
18	58038742	Affx-89006210	Affx-89006210	Met281Val	1	1e-06	-	-	1	44084	1676	0	45761	NA	1	1	0	0	good	good	good	good	FPP	good
18	58039061	Affx-89008317	rs1159323398	Trp174Cys	1	1e-06	0	0	0	44505	1256	0	45761	NA	0	0	0	0	good	good	good	good	good	good
18	58039333	Affx-89022645	Affx-89022645	Cys84Arg	2	2e-06	-	-	0	45417	344	0	45761	NA	0	0	0	0	good	good	good	good	good	good
18	58038951	Affx-89023617	Affx-89023617	Leu211Pro	2	2e-06	-	-	0	45725	36	0	45761	NA	0	0	0	0	good	good	good	good	good	good
18	58038673	Affx-89017973	rs774918906	Leu304Phe	1	1e-06	0	0	0	45714	47	0	45761	NA	0	0	0	0	good	good	good	good	good	good
18	58038745	Affx-80259085	rs756232889	Phe280Leu	1	1e-06	0	0	0	44969	792	0	45761	NA	0	0	0	0	good	good	good	good	good	good
18	58038999	Affx-89023684	rs755818059	Ile195Ser	1	1e-06	0	0	0	42807	2954	0	45761	NA	0	0	0	0	good	good	good	good	good	good
18	58038760	rs201813179	rs201813179	Pro275Ser	3	3e-06	2.64e-05	2.41618	0	45748	13	0	45761	NA	0	0	0	0	good	good	good	good	good	good
18	58038681	Affx-89014062	Affx-89014062	Ile301Thr	4	4e-06	-	-	1	45737	23	0	45761	NA	1	1	0	0	good	good	good	good	FPP	good
18	58039221	rs13447330	rs13447330	Ile121Thr	3	3e-06	8.792e-06	0.804661	0	45394	367	0	45761	NA	0	0	0	0	good	good	good	good	good	good
18	58039422	Affx-80259089	rs376439188	Leu54Pro	7	7e-06	8.801e-06	0.805485	0	45053	708	0	45761	NA	0	0	0	0	good	good	good	good	good	good
18	58038722	rs121917829	rs121917829	Tyr287Term	10	1.1e-05	-	-	2	45721	38	0	45761	NA	2	1	0	0	good	good	good	good	FPP	good
